# Supplementary material
Source: bioRxiv or medRxiv preprint supplement (https://www.biorxiv.org/highwire/filestream/83669/field_highwire_adjunct_files/3/272120-4.pdf)

Stochastic Trajectories with Cell Division  
(15 minute division time)

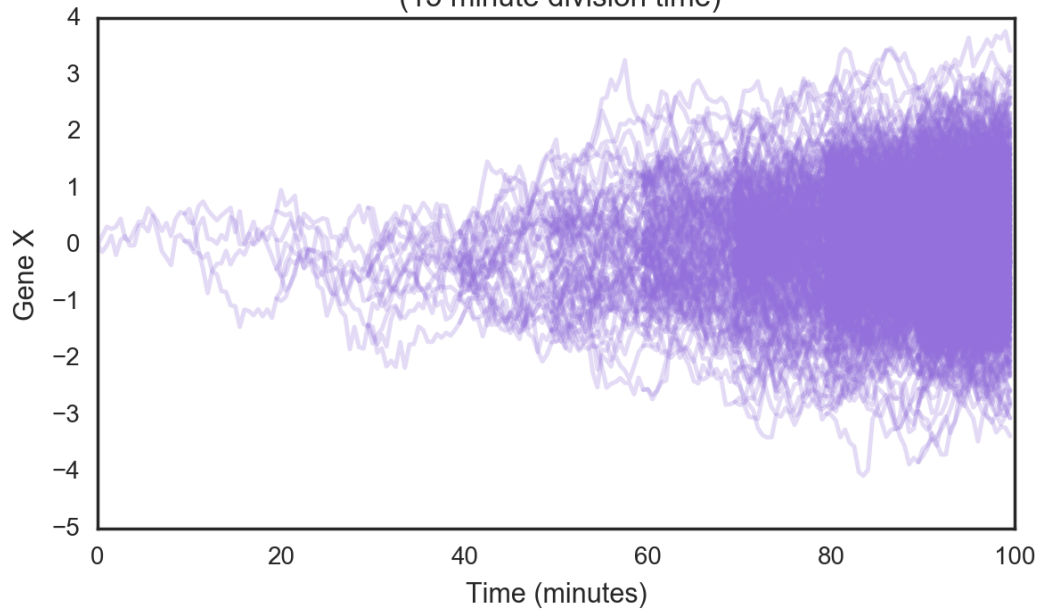

Variance over Time as a Function of Growth Rate

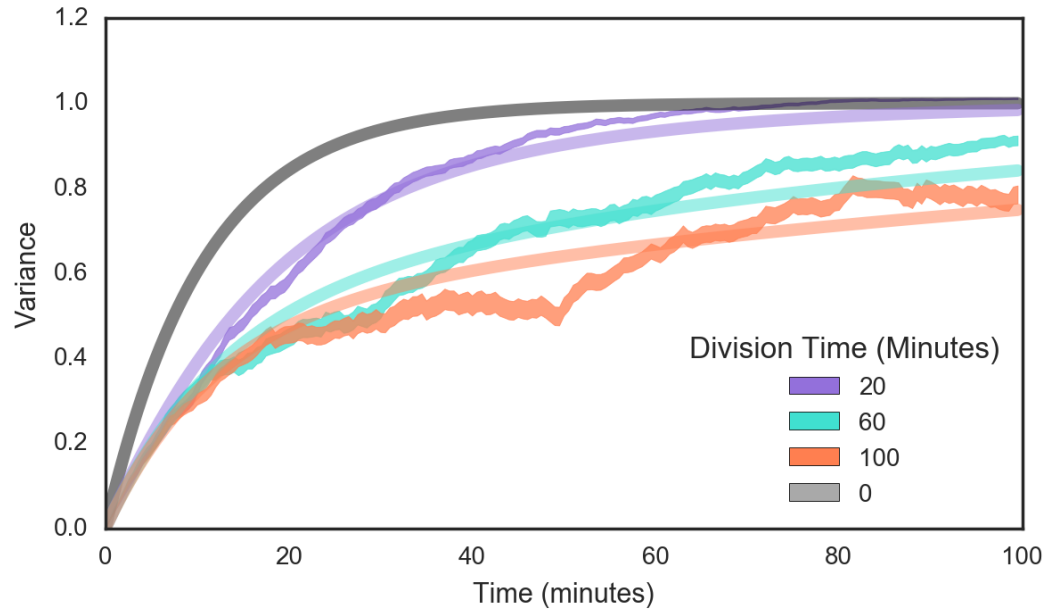

Supplement: Supplementary file [file 272120-4.pdf]
